# Supplementary material for: Augmin accumulation on long-lived microtubules drives amplification and kinetochore-directed growth
Source: PubMed Central journal article supplement — J Cell Biol. 2019 May 21;218(7):2150–68. doi: 10.1083/jcb.201805044 (PMC6605806; doi:10.1083/jcb.201805044), 2019-05-21
Supplement: JCB_201805044_sm.pdf [file JCB_201805044_sm.pdf]

## Supplemental material

David et al., <https://doi.org/10.1083/jcb.201805044>

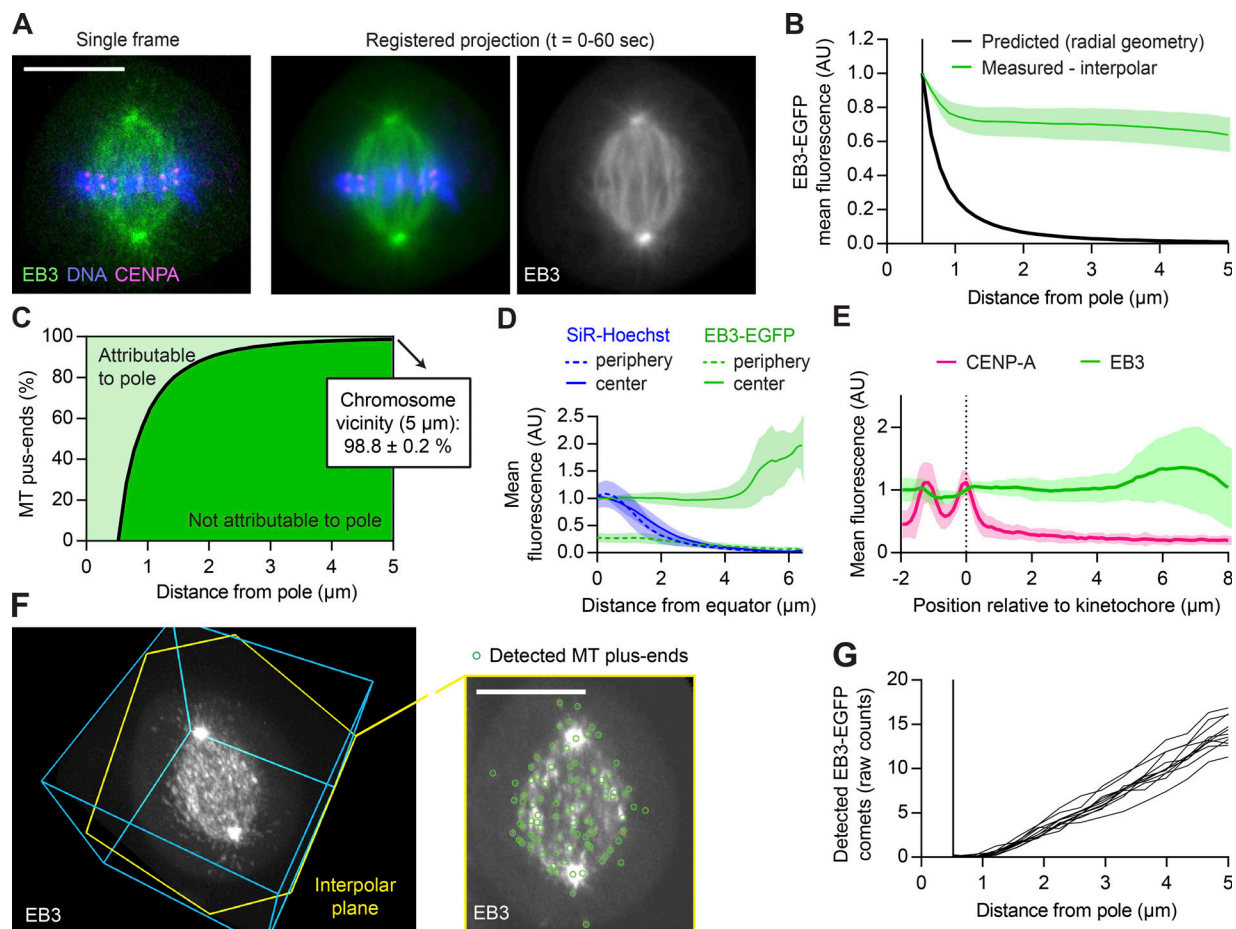

**Figure S1. Additional characterization of MT plus end distributions in unperturbed metaphase spindles. (A, B, D, and E)** Live-cell confocal microscopy of hTERT-RPE1 cells expressing EB3-EGFP (green) and mCherry-CENPA (magenta), stained with SiR-Hoechst (blue). **(A)** 1-min time-lapse videos were acquired during metaphase at 2 s/frame (see Video 2), registered to correct for spindle rotation (see Materials and methods for details) and projected to obtain mean-intensity images for analysis of MT plus end distributions. **(B)** Mean EB3-EGFP fluorescence intensity quantified in the projections thus obtained as in Fig. 1 (B and C). Black line indicates predicted signal dilution by radial geometry. ( $n = 25$  cells, individual measurements normalized to centrosome rim). **(C)** Fractions of MT plus ends attributable (light green) and not attributable (dark green) to nucleation at the spindle poles in HeLa metaphase spindles. Computed from the measurements shown in Fig. 1 C as detailed in Materials and methods. **(D)** Mean EB3-EGFP and SiR-Hoechst fluorescence measured across the chromosome–cytoplasm boundary as described in Fig. 1 (D and E;  $n = 25$  cells). **(E)** Mean EB3-EGFP and mCherry-CENPA fluorescence along curved lines connecting pairs of sister KTs to one of the spindle poles. Quantified as described in Fig. 1 (F and G;  $n = 49$  profiles in 8 cells). **(F)** Automated 3D detection of MT plus ends in EB3-EGFP images. The slice highlighted in yellow follows the plane defined by the spindle poles and a random KT. **(G)** Quantification of detected MT plus ends at increasing distances from the nearest spindle pole. Plotted are the mean plus end numbers per video frame for each cell ( $n = 11$  cells). Lines and shaded areas denote mean  $\pm$  SD, respectively. Scale bars, 10  $\mu$ m. AU, arbitrary units.

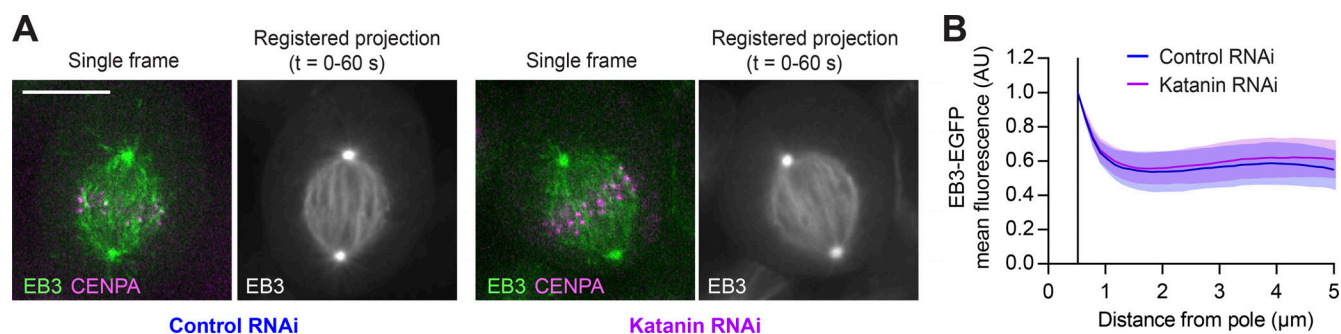

Figure S2. **MT plus end distribution in spindles of Katanin RNAi cells.** EB3-EGFP and mCherry-CENPA-expressing HeLa cells transfected with control or Katanin-targeting siRNAs ( $n = 14$  and  $18$  cells, respectively). **(A)** Cells imaged during metaphase by live-cell confocal microscopy, for 1 min at 1 s/frame. Scale bar,  $10 \mu\text{m}$ . **(B)** Mean EB3-EGFP fluorescence intensity quantified in average-intensity projections of registered time-lapse videos, as described in Fig. 1 (B and C). Lines and shaded areas denote mean  $\pm$  SD, respectively. AU, arbitrary units.

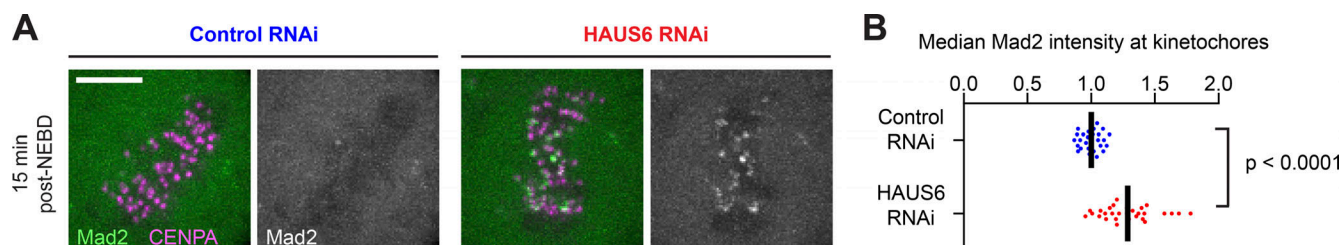

Figure S3. **Chromosome attachment defects in HAUS6 RNAi cells.** Live-cell microscopy of Mad2-EGFP- and mCherry-CENPA-expressing cells 48 h after transfection with control or HAUS6-targeting siRNAs (29 cells per condition, collected in three independent experiments). **(A)** 3D confocal stacks of mitotic cells were acquired 15 min after nuclear envelope breakdown (NEBD). Shown are representative maximum-intensity projections. Scale bar,  $5 \mu\text{m}$ . **(B)** Mad2-EGFP intensities were quantified on mCherry-labeled KT and normalized to cytoplasmic levels. Each data point plotted is the median value measured in one cell; bars denote mean of all cells. Distributions were compared not assuming normality using a Kolmogorov-Smirnov test.

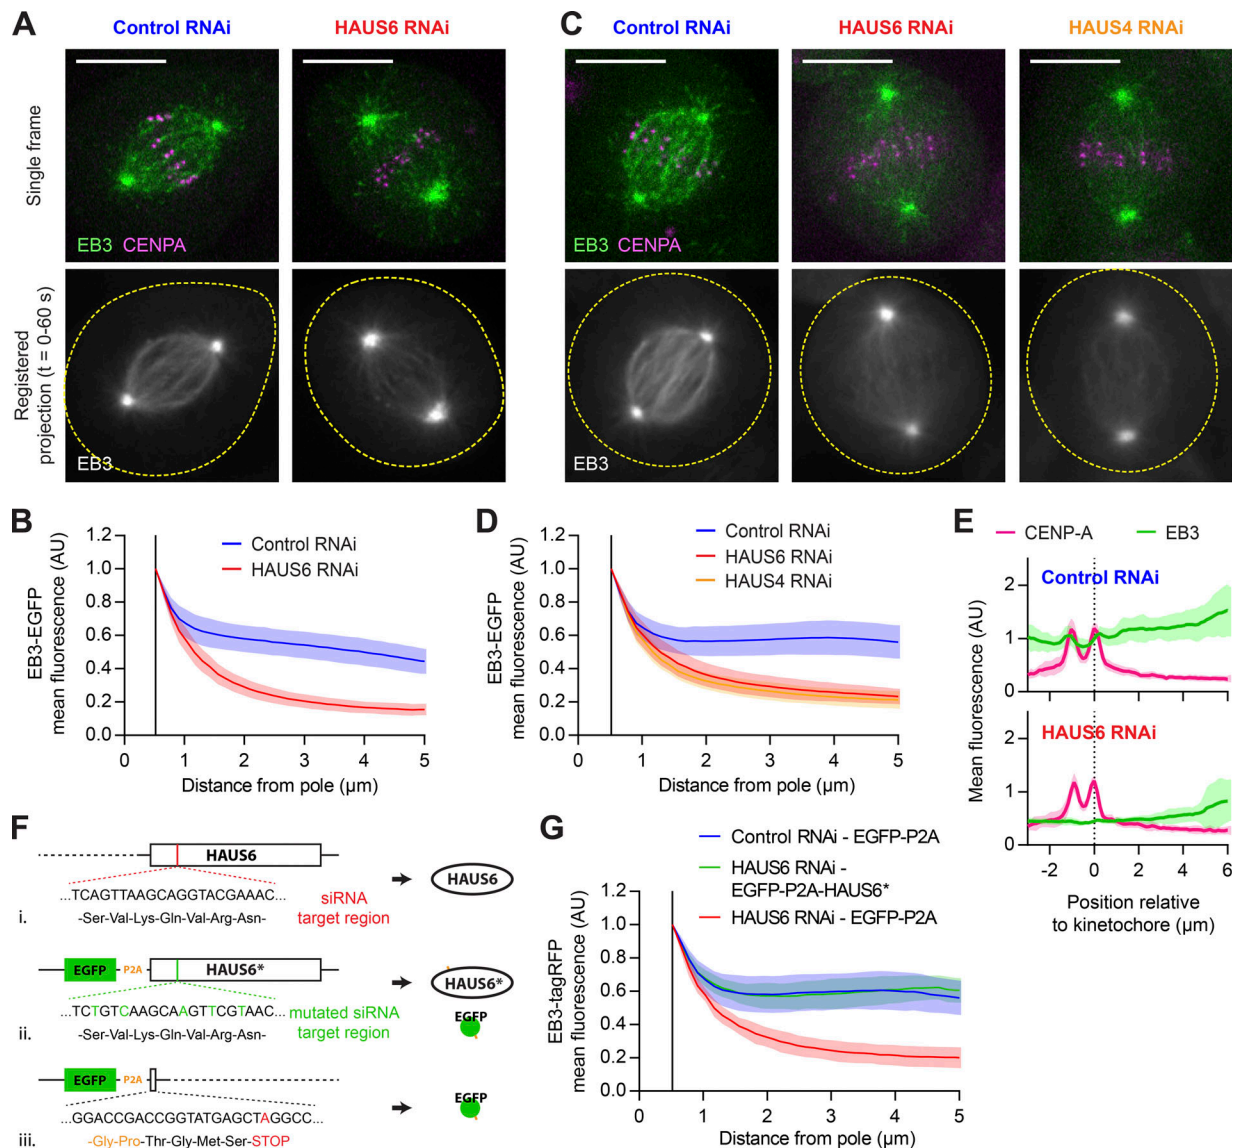

**Figure S4. Additional characterization of MT plus end distributions in HAUS6 RNAi spindles. (A–E)** Live-cell confocal microscopy of EB3-EGFP- and mCherry-CENPA-expressing cells. **(A and B)** hTERT-RPE1 cells transfected with control or HAUS6-targeting siRNAs ( $n = 34$  and  $31$  cells, respectively, collected in three independent experiments). **(C–E)** HeLa cells transfected with control, HAUS4-targeting or HAUS6-targeting siRNAs ( $n = 33, 34,$  and  $36$  cells, respectively, collected in three independent experiments). **(A and C)** 1-min confocal time-lapse videos were acquired during metaphase at  $2$  s/frame. The dashed yellow lines indicate cell boundaries. Scale bars,  $10 \mu\text{m}$ . **(B and D)** Mean EB3-EGFP fluorescence intensity quantified in average-intensity projections of registered time-lapse videos, as described in Fig. 1 (B and C). **(E)** Mean EB3-EGFP and mCherry-CENPA fluorescence along curved lines connecting pairs of sister KTs to one of the spindle poles. Quantified as described in Fig. 1 (F and G;  $n = 29$  and  $22$  profiles for control and HAUS6 RNAi cells, respectively, in seven cells per condition). **(F and G)** EB3-tagRFP-expressing cells were transfected with control or HAUS6-targeting siRNAs. **(F)** Plasmids encoding for EGFP-P2A-HAUS6\* (Fii, for expression of siRNA-resistant HAUS6) or EGFP-P2A (Fiii, control) were delivered  $24$  h later. See Materials and methods for details. **(G)**  $48$  h after siRNA transfection, cells were imaged during metaphase as in A and C. Mean EB3-tagRFP fluorescence was measured in EGFP-positive cells as described in Fig. 1 (B and C;  $n = 7, 10,$  and  $5$  cells for control RNAi-EGFP-P2A, HAUS6 RNAi-EGFP-P2A-HAUS6\*, and HAUS6 RNAi-EGFP-P2A, respectively). Lines and shaded areas denote mean  $\pm$  SD, respectively. AU, arbitrary units.



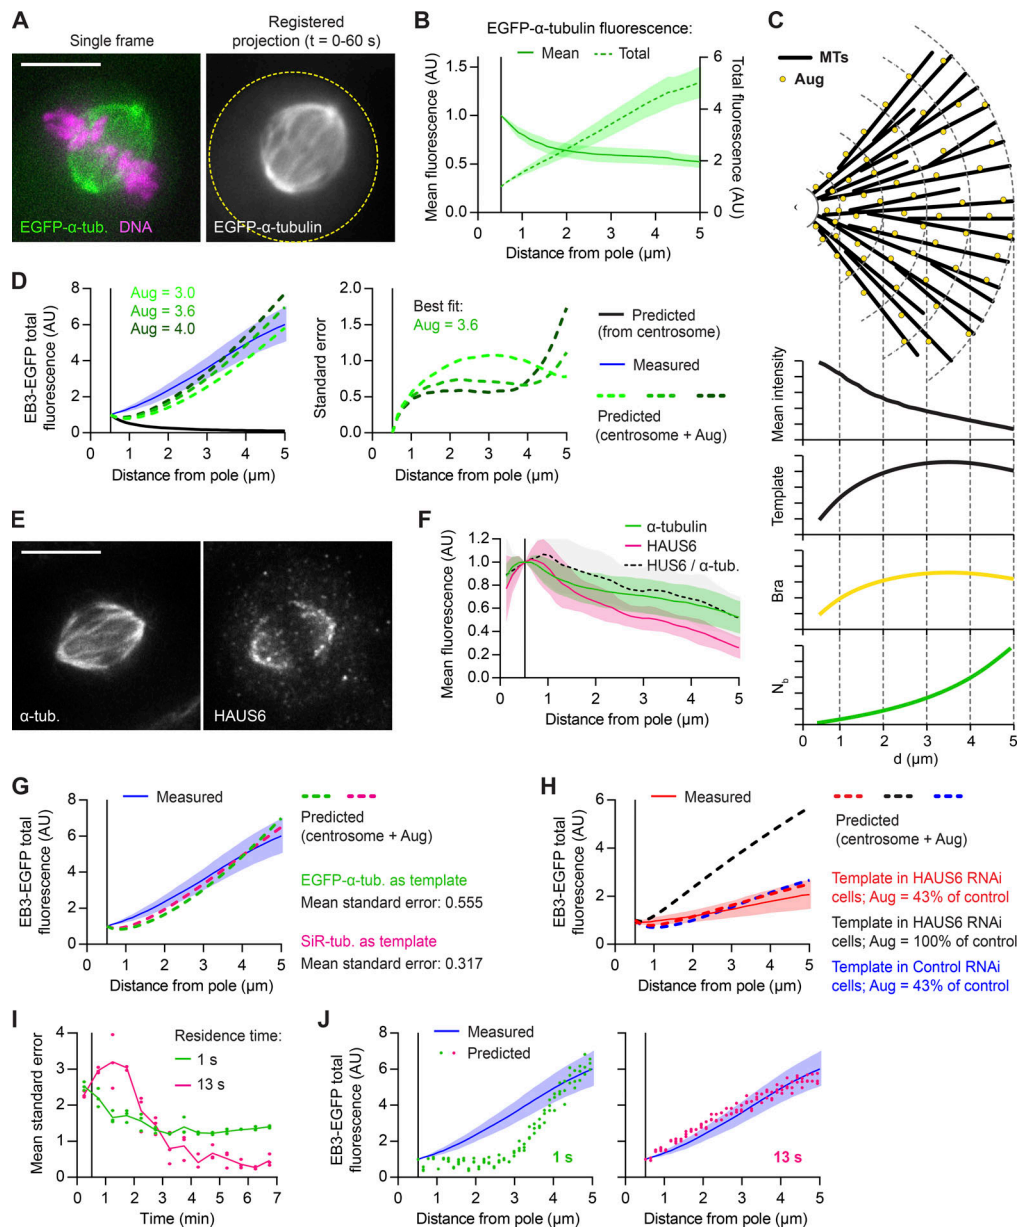

**Figure S5. Mathematical modeling of MT amplification in the metaphase spindle.** (A and B) Live-cell microscopy of HeLa cells expressing EGFP- $\alpha$ -tubulin (green) and H2b-mCherry (magenta). (A) 1-min time-lapse videos were acquired during metaphase at 2 s/frame, registered to correct for spindle rotation and projected to obtain mean-intensity images for analysis of MT lattice distributions. The dashed yellow line denotes the cell boundary. (B) Mean and total EGFP- $\alpha$ -tubulin fluorescence quantified in inter-polar spindle regions as in Fig. 1 B. (C) Schematic representation of a model for uniform amplification of a template MT network. MT branching factors (Aug) distribute across MT lattices and generate plus ends at a fixed rate. The frequency distribution of MT-dependent plus end generation (Bra) is thus set to be a linear function of template distribution (Template), which is inferred from the mean fluorescence intensity of a MT marker (measured as in A and B). The number of MT plus ends generated on MT lattices ( $N_b$ ) is a function of the branching frequency distribution Bra. For a prediction of MT plus end distributions,  $N_b$  is added to the number of plus ends originating at the spindle poles. See Materials and methods for details. (D) Three separate mathematical simulations wherein the template network measured in B is amplified using the indicated amplification parameters (Aug). The predicted MT plus end distribution is compared with the total EB3-EGFP fluorescence measured in Fig. 1 (A–C, left). The standard error of each prediction is plotted against distance from pole (right). (E) HAUS6 and  $\alpha$ -tubulin or visualized by immunofluorescence in metaphase spindles of HeLa cells. (F) For data in E, mean fluorescence intensities were quantified in inter-polar regions as in Fig. 1 (B and C;  $n = 34$  cells in two independent experiments). (G and H) Mathematical predictions of MT template amplification. The predicted totals of MT plus ends are compared with the total EB3-EGFP fluorescence profiles measured in Fig. 1 (B and C; G) or in Fig. 4 E (H). (G) The measured fluorescence of the indicated MT markers (plotted in Fig. 3 F) was used to estimate MT template distributions. (H) The SiR-tubulin fluorescence measured in Fig. 4 C (in control or HAUS6 RNAi cells, as indicated) was used to estimate MT template distributions. (I and J) Computational simulations of MT amplification in a dynamic steady state (see main text and Methods for details). Two sets of three simulations were run, with Augmin residence times of 1 or 13 s, as indicated. The MT plus end distributions predicted over time were compared with those measured in metaphase spindles. (I) Mean standard error of each prediction. Each data point is the mean measured over 30 s, in individual simulations; lines denote the mean of three simulations over time for each tested residence time. (J) Mean MT plus end distributions predicted for the last 30 s of each simulation, compared with the total EB3-EGFP fluorescence measured in Fig. 1 (B and C). Lines and shaded areas denote mean  $\pm$  SD, respectively. Scale bars, 10  $\mu$ m. AU, arbitrary units.

Table S1. **Key resources and reagents used in this study, and the respective sources**

| Reagent or resource                                                            | Source                                                                                                                                                                                                         | Identifier                            |
|--------------------------------------------------------------------------------|----------------------------------------------------------------------------------------------------------------------------------------------------------------------------------------------------------------|---------------------------------------|
| <b>Experimental models: cell lines used in this study</b>                      |                                                                                                                                                                                                                |                                       |
| HeLa Kyoto (WT)                                                                | Obtained from S. Narumiya (Kyoto University, Kyoto, Japan)                                                                                                                                                     | Lab ID #1                             |
| HeLa Kyoto EB3-EGFP/mCherry-CENPA                                              | <a href="#">Cuylen et al., 2016</a>                                                                                                                                                                            | Lab ID #826                           |
| HeLa Kyoto EGFP- $\alpha$ -tubulin/H2B-mCherry                                 | <a href="#">Dick and Gerlich, 2013</a>                                                                                                                                                                         | Lab ID #157                           |
| hTERT-RPE1 RIEP receptor                                                       | <a href="#">Samwer et al., 2017</a>                                                                                                                                                                            | Lab ID #1092                          |
| hTERT-RPE1 EB3-EGFP/mCherry-CENPA                                              | This study                                                                                                                                                                                                     | Lab ID #1434                          |
| HeLa Kyoto EB3-tagRFP                                                          | This study                                                                                                                                                                                                     | Lab ID #1753                          |
| HeLa Kyoto Mad2-EGFP/mCherry-CENPA                                             | <a href="#">Dick and Gerlich, 2013</a>                                                                                                                                                                         | Lab ID #1156                          |
| <b>Plasmids</b>                                                                |                                                                                                                                                                                                                |                                       |
| Lenti_EGFP-P2A-BAF_IRES_Blast                                                  | <a href="#">Samwer et al., 2017</a>                                                                                                                                                                            | Lab ID #1161                          |
| Lenti_EGFP-P2A-HAUS6_IRES_Blast                                                | This study                                                                                                                                                                                                     | Lab ID #1758                          |
| Lenti_EGFP-P2A-siRNAresHAUS6_IRES_Blast                                        | This study                                                                                                                                                                                                     | Lab ID #1759                          |
| Lenti_EGFP-P2A_IRES_Blast                                                      | This study                                                                                                                                                                                                     | Lab ID #1765                          |
| pCR-BluntII-TOPO_HAUS6                                                         | Mammalian Gene Collection; storage and distribution provided by the PlasmID Repository at Harvard Medical School and funded in part by National Cancer Institute Cancer Center support grant NHI 5 P30 CA06516 | PlasmID<br>HsCD00347195, Lab ID #1757 |
| <b>Chemicals</b>                                                               |                                                                                                                                                                                                                |                                       |
| SiR-Hoechst                                                                    | Obtained from Kai Johnsson (EPFL, Lausanne, Switzerland; <a href="#">Lukinavičius et al., 2015</a> )                                                                                                           | Lab ID #377                           |
| SiR-tubulin                                                                    | Obtained from Kai Johnsson ( <a href="#">Lukinavičius et al., 2014</a> )                                                                                                                                       | Lab ID #295                           |
| RNAiMAX                                                                        | Thermo Fisher Scientific                                                                                                                                                                                       | 13778-150                             |
| Tween 80                                                                       | Merck (Sigma-Aldrich)                                                                                                                                                                                          | P1754                                 |
| <b>Oligonucleotides: siRNAs used in this study</b>                             |                                                                                                                                                                                                                |                                       |
| Scrambled control sense: 5'-UUCUCCGAACGUGUCACGUTT-3'                           | Ambion                                                                                                                                                                                                         | s229174 Lab ID #153                   |
| HAUS6 sense: 5'-CAGUUAAGCAGGUACGAAATT-3'                                       | Qiagen: HP custom siRNA, unmodified                                                                                                                                                                            | Lab ID #218                           |
| HAUS4 sense: 5'-AGAUUUUGUCCGACACUUATT-3'                                       | Ambion                                                                                                                                                                                                         | s29779 Lab ID #213                    |
| KATNA1 sense: 5'-GGCUCGAUUUUUUCUCCATT-3'                                       | Ambion                                                                                                                                                                                                         | s21895 Lab ID #269                    |
| <b>Antibodies</b>                                                              |                                                                                                                                                                                                                |                                       |
| Mouse monoclonal anti-actin (used for WB at 1: 10000)                          | Merck (Millipore)                                                                                                                                                                                              | MAB1501 Lab ID #186                   |
| Rabbit monoclonal anti-HAUS6 (used for WB at 1:2,000, for IF at 1:500)         | Abcam                                                                                                                                                                                                          | AB173281 Lab ID #268                  |
| HRP-goat anti-mouse (used for WB at 1:5,000)                                   | Bio-Rad                                                                                                                                                                                                        | 170-6516 Lab ID #185                  |
| HRP-goat anti-rabbit (used for WB at 1:5,000)                                  | Bio-Rad                                                                                                                                                                                                        | 170-6515 Lab ID #158                  |
| Rabbit monoclonal anti- $\alpha$ -tubulin, acetyl K40 (used for IF at 1:1,000) | Abcam                                                                                                                                                                                                          | AB179484 Lab ID #315                  |
| Mouse monoclonal anti- $\alpha$ -tubulin-FITC (used for IF at 1:1,000)         | Merck (Sigma-Aldrich)                                                                                                                                                                                          | F2168 Lab ID #172                     |
| Alexa Fluor 594 anti-rabbit (used for IF at 1:1,000)                           | Molecular Probes                                                                                                                                                                                               | A21207 Lab ID #56                     |
| <b>Software and plugins</b>                                                    |                                                                                                                                                                                                                |                                       |
| ImageJ 1.48h, 64-bit                                                           | National Institutes of Health                                                                                                                                                                                  | -                                     |
| MultiStackReg Fiji plugin                                                      | <a href="https://github.com/miura/MultiStackRegistration">https://github.com/miura/MultiStackRegistration</a>                                                                                                  | -                                     |
| Running ZProjector Fiji plugin                                                 | <a href="https://imagej.nih.gov/ij/plugins/index.html#more">https://imagej.nih.gov/ij/plugins/index.html#more</a>                                                                                              | ---                                   |
| MATLAB R2016a, 64-bit                                                          | MathWorks                                                                                                                                                                                                      | -                                     |
| GraphPad Prism 7                                                               | GraphPad Software                                                                                                                                                                                              | -                                     |
| <b>Other</b>                                                                   |                                                                                                                                                                                                                |                                       |
| Nunc Lab-Tek II chambered coverglass                                           | Thermo Fisher Scientific                                                                                                                                                                                       | 155409                                |

IF, immunofluorescence; WB, Western blot; -, not applicable.

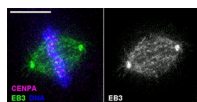

Video 1. **Growing MT plus ends in a live HeLa cell, imaged by spinning disk confocal microscopy.** Representative example of a metaphase cell expressing EB3-EGFP (green) and mCherry-CENPA (magenta). Cells were preincubated with SiR-Hoechst for staining of chromosomes (blue). Selected frames are shown in Fig. 1 A. Spindle morphology and the overall distribution of EGFP-marked plus ends (right) remained constant throughout. Scale bar, 10  $\mu$ m.

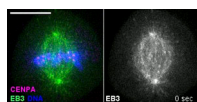

Video 2. **Growing MT plus ends in a live hTERT-RPE1 cell, imaged by spinning disk confocal microscopy.** Representative example of a metaphase cell expressing EB3-EGFP (green) and mCherry-CENPA (magenta). Cells were preincubated with SiR-Hoechst for staining of chromosomes (blue). A selected frame is reproduced in Fig. S1 A. Spindle morphology and the overall distribution of EGFP-marked plus ends (right) remained constant throughout. Scale bar, 10  $\mu$ m.

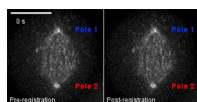

Video 3. **Time-lapse movie registration to correct for spindle rotation.** Individual frames of EB3-EGFP videos were registered by rigid-body transformation before analysis (see Materials and methods for details). Overlay illustrates automatic tracking of spindle poles before and after registration. Scale bar, 10  $\mu$ m.

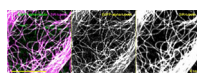

Video 4. **SiR-tubulin labels the lattice of MTs with a delay relative to their polymerization.** HeLa cells expressing EGFP- $\alpha$ -tubulin (green) were incubated with 100nM SiR-tubulin (magenta) and imaged by point-scanning confocal microscopy at 1 s/frame. Images were collected at the bottom surface of interphase cells, in regions of low MT density, to resolve individual MTs as they grow. The first frame is reproduced in Fig. 3 A. Scale bar, 10  $\mu$ m.

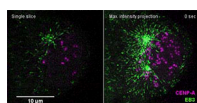

Video 5. **Growing MT plus ends in a live HeLa cell, imaged by 3D Lattice light-sheet microscopy.** Representative example of an early prometaphase cell expressing EB3-EGFP (green) and mCherry-CENPA (magenta). Shown are a selected focal plane (left) and a maximum-intensity projection (right) of a deconvolved video ( $t = 0$ , nuclear envelope disassembly). Selected frames of the projection are reproduced in Fig. 5 A. Scale bar, 10  $\mu$ m.

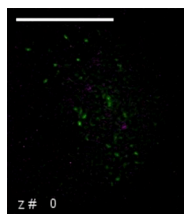

Video 6. **3D stack of prometaphase cell imaged by lattice light-sheet microscopy.** HeLa cell expressing EB3-EGFP (green) and mCherry-CENPA (magenta). Same cell as in Video 5, at  $t = 150$  s after nuclear envelope disassembly. Scale bar, 10  $\mu$ m.

## References

- Cuylen, S., C. Blaukopf, A.Z. Politi, T. Müller-Reichert, B. Neumann, I. Poser, J. Ellenberg, A.A. Hyman, and D.W. Gerlich. 2016. Ki-67 acts as a biological surfactant to disperse mitotic chromosomes. *Nature*. 535:308–312. <https://doi.org/10.1038/nature18610>
- Dick, A.E., and D.W. Gerlich. 2013. Kinetic framework of spindle assembly checkpoint signalling. *Nat. Cell Biol.* 15:1370–1377. <https://doi.org/10.1038/ncb2842>
- Lukinavičius, G., L. Reymond, E. D'Este, A. Masharina, F. Göttfert, H. Ta, A. Güther, M. Fournier, S. Rizzo, H. Waldmann, et al. 2014. Fluorogenic probes for live-cell imaging of the cytoskeleton. *Nat. Methods*. 11:731–733. <https://doi.org/10.1038/nmeth.2972>
- Lukinavičius, G., C. Blaukopf, E. Pershagen, A. Schena, L. Reymond, E. Derivery, M. González-Gaitán, E. D'Este, S.W. Hell, D. Wolfram Gerlich, and K. Johansson. 2015. SiR-Hoechst is a far-red DNA stain for live-cell nanoscopy. *Nat. Commun.* 6:8497. <https://doi.org/10.1038/ncomms9497>
- Samwer, M., M.W.G. Schneider, R. Hoefler, P.S. Schmalhorst, J.G. Jude, J. Zuber, and D.W. Gerlich. 2017. DNA Cross-Bridging Shapes a Single Nucleus from a Set of Mitotic Chromosomes. *Cell*. 170:956–972.e23. <https://doi.org/10.1016/j.cell.2017.07.038>
